# Supplementary material
Source: PubMed Central journal article supplement (PMC6911370)
Supplement: NIHMS1061915-supplement-Supp_Files.pdf [file NIHMS1061915-supplement-Supp_Files.pdf]

## Supplementary Materials

Fig. S1. Protein levels of cytokine and transcription factors in ILC3s at different points of the circadian cycle.

Fig. S2. Acute SW model disrupts circadian rhythm without altering food intake or bodyweight.

Fig. S3. REV-ERB $\alpha$  deficiency results in reduced NKp46<sup>+</sup> ILC3 in multiple tissues

Fig. S4. REV-ERB $\beta$  deficiency alone does not affect ILC3s.

Fig. S5. Acute circadian disruption does not affect ILC3 mitochondria.

Fig. S6. Reduction of NKp46<sup>+</sup> ILC3 in *Nr1d1*<sup>-/-</sup> mice is not due to increase in plasticity.

Fig. S7. Accessibility of *Nfil3*, *Il17*, and *Tbp* loci in *Nr1d1*<sup>+/+</sup> and *Nr1d1*<sup>-/-</sup> ILC3s.

Table S1. Motif enrichment of known motifs by HOMER in *Nr1d1*<sup>+/+</sup> NKp46<sup>-</sup> ILC3s.

Table S2. *De novo* motif enrichment by HOMER in *Nr1d1*<sup>+/+</sup> NKp46<sup>-</sup> ILC3s.

Table S3. Motif enrichment of known motifs by HOMER in *Nr1d1*<sup>-/-</sup> NKp46<sup>-</sup> ILC3s.

Table S4. *De novo* motif enrichment by HOMER in *Nr1d1*<sup>-/-</sup> NKp46<sup>-</sup> ILC3s.

Table S5. Sequences of primers used for qPCR.

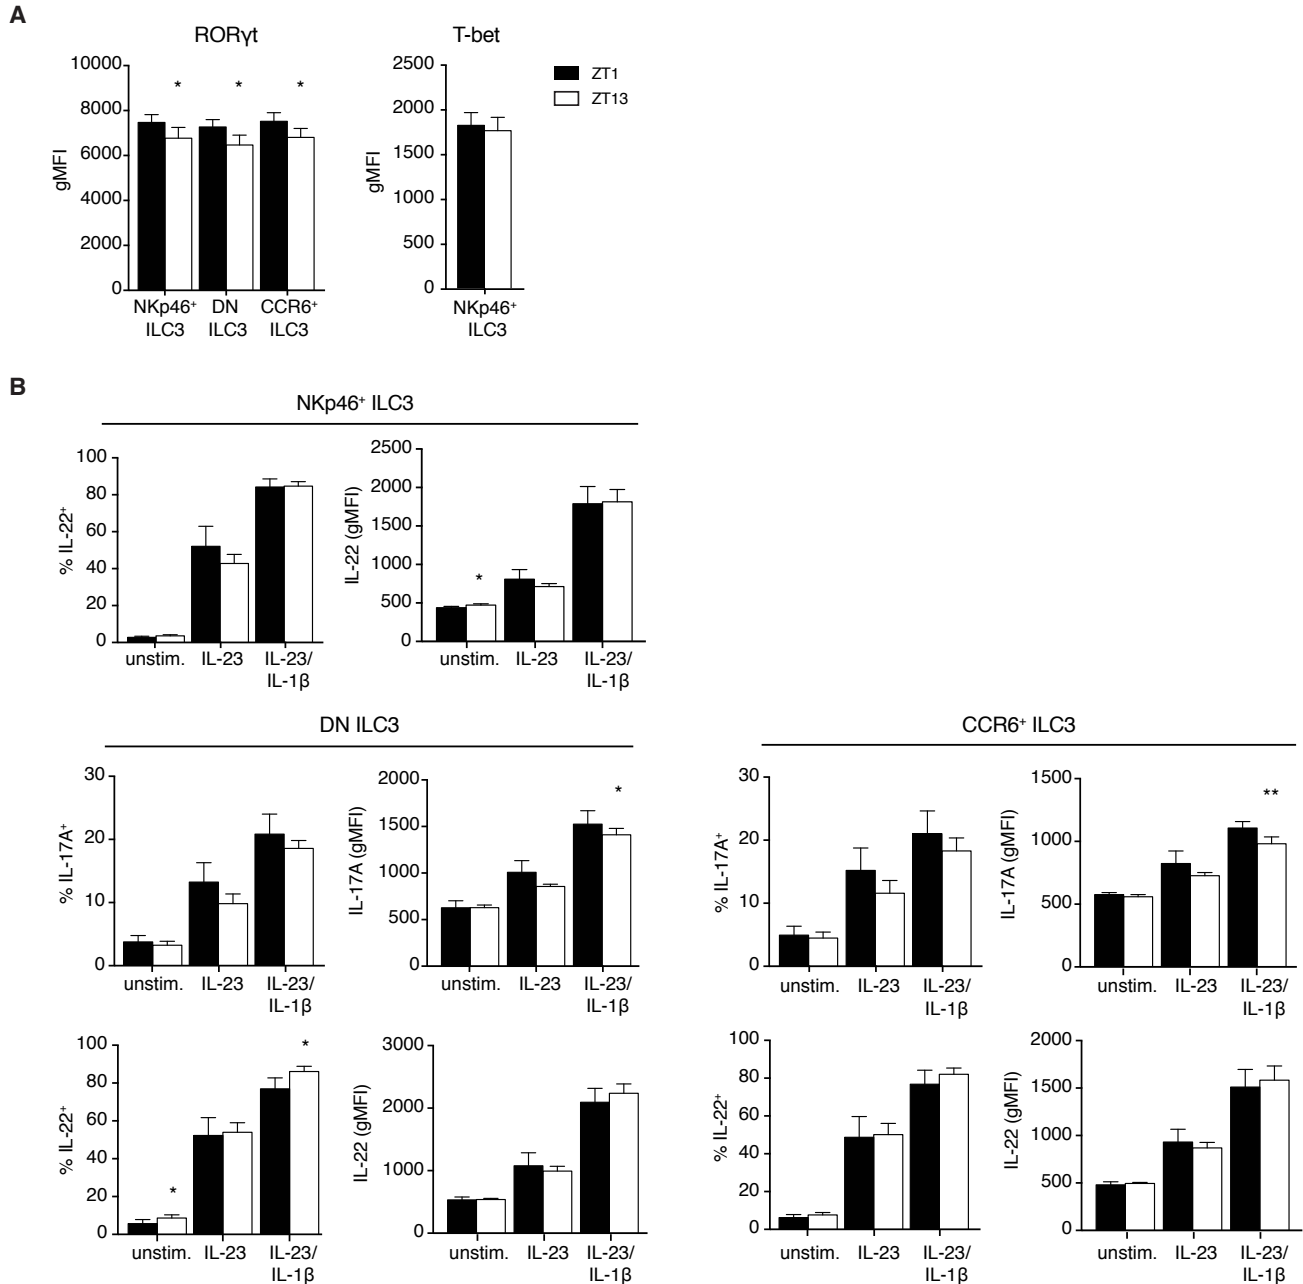

**Figure S1. Protein levels of cytokine and transcription factors in ILC3s at different points of the circadian cycle.**

C57Bl6/J mice were examined at ZT1 and ZT13. **A)** ROR $\gamma$ t and T-bet expression by intracellular staining in ILC3 subsets. **B)** IL-17A and IL-22 production in ILC3 subsets in response to in vitro stimulation with 1 ng/mL IL-23 or 10 ng/mL IL-23/IL-1 $\beta$ . Frequency of cytokine producing cells and amount of cytokine per cell (gMFI) are shown. Statistical analysis was performed using Student's t-test. Bars indicate mean ( $\pm$ SD). \*, P<0.05; \*\*, P<0.01; \*\*\*, P<0.001. Data are representative of two independent experiments, n=5 per group per experiment.

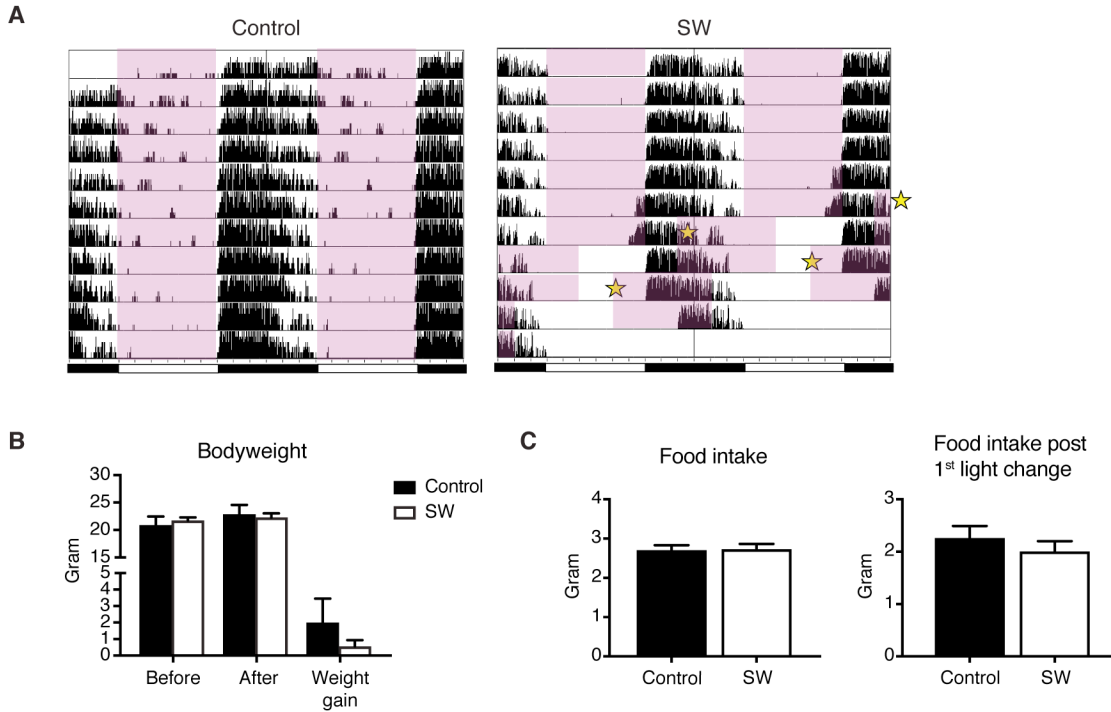

**Figure S2. Acute SW model disrupts circadian rhythm without altering food intake or bodyweight.**

**A)** Wheel-running activity of control and SW mice (colored blocks represent lighting schedule, stars indicate advance of light/dark cycle, double plotted for better visualization). **B)** Bodyweight and weight changes of control and SW mice. **C)** Average food intake per day during experiment (left) and food intake after first light change (right) of control and SW mice. Statistical analysis was performed using Student's t-test. Bars indicate mean ( $\pm$ SD). \*,  $P < 0.05$ ; \*\*,  $P < 0.01$ ; \*\*\*,  $P < 0.001$ . Data are representative of two independent experiments (A-B),  $n = 5$  per group per experiment.

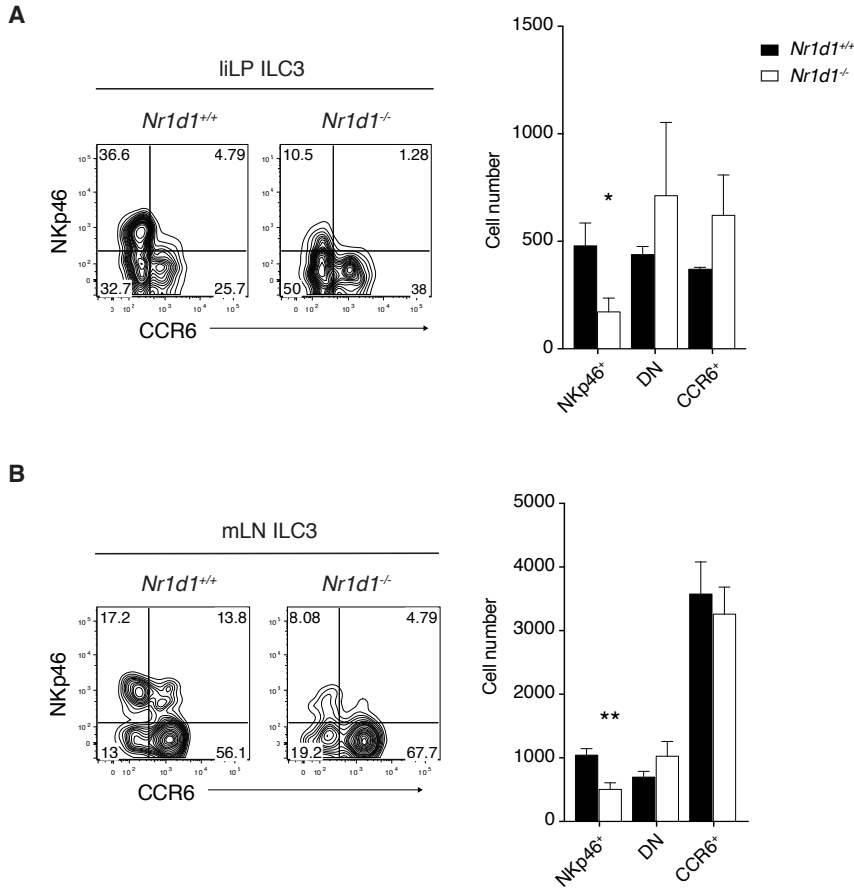

**Figure S3. REV-ERB $\alpha$  deficiency results in reduced NKp46<sup>+</sup> ILC3 in multiple tissues**  
 Representative plots (left) and numbers (right) of ILC3 subsets in: **A**) large intestine lamina propria (liLP), **B**) mesenteric lymph nodes (mLN). Statistical analysis was performed using Student's t-test. Bars indicate mean ( $\pm$ SD). \*, P<0.05; \*\*, P<0.01; \*\*\*, P<0.001. Data are representative of two independent experiments (A), n=3 per group per experiment.

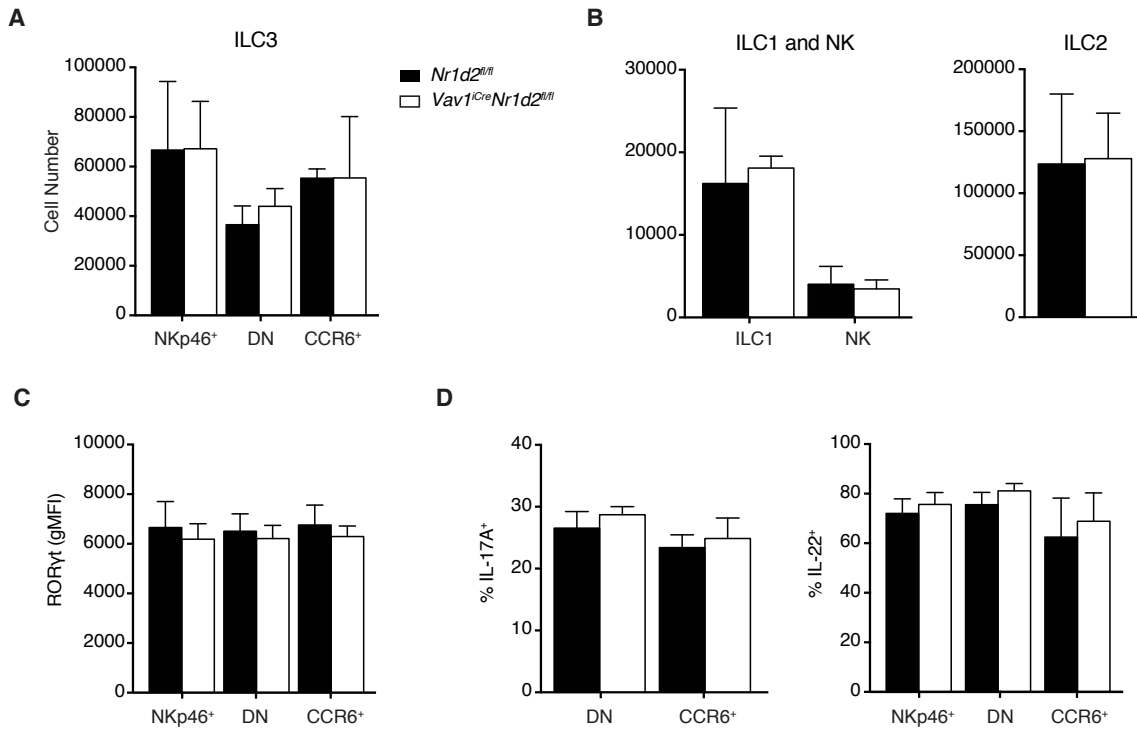

**Figure S4. REV-ERB $\beta$  deficiency alone does not affect ILC3s.**

ILCs were isolated from *Nr1d2<sup>fl/fl</sup>* and *Vav1<sup>iCre</sup>Nr1d2<sup>fl/fl</sup>* siLP. Cell counts of **A)** ILC3s, **B)** ILC1s, NKs, and ILC2s. **C)** Quantification of ROR $\gamma$ t levels by intracellular staining in ILC3 subsets. **D)** Frequency of IL-17A<sup>+</sup> and IL-22<sup>+</sup> ILC3s after in vitro stimulation with 10 ng/mL of IL-23 and IL-1 $\beta$ . Statistical analysis was performed using Student's t-test. Bars indicate mean ( $\pm$ SD). Data are representative of two independent experiments, n=3 per group per experiment.

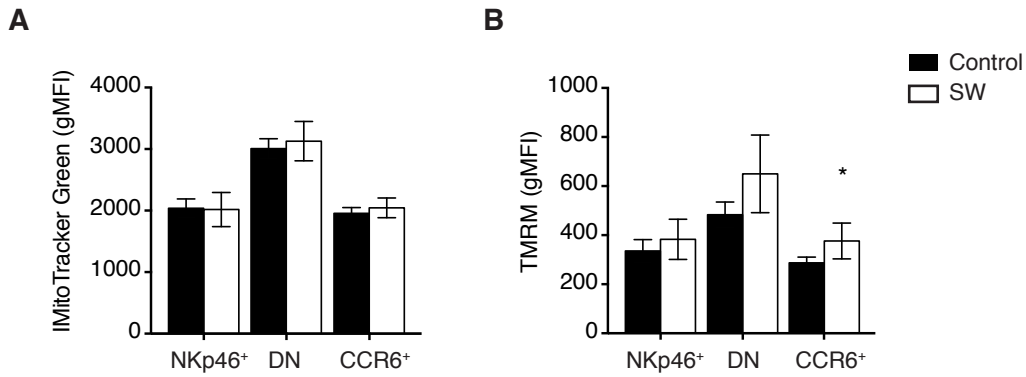

**Figure S5. Acute circadian disruption does not affect ILC3 mitochondria.**

Acute shift work model as in Fig. 2. Quantification of **A**) mitochondrial content by MitoTracker Green FM staining and **B**) mitochondrial potential by TMRM staining in ILC3 subsets. Statistical analysis was performed using Student's t-test. Bars indicate mean ( $\pm$ SD). \*, P<0.05; \*\*, P<0.01; \*\*\*, P<0.001. Data are representative of two independent experiments (A-B), n=5 per group per experiment.

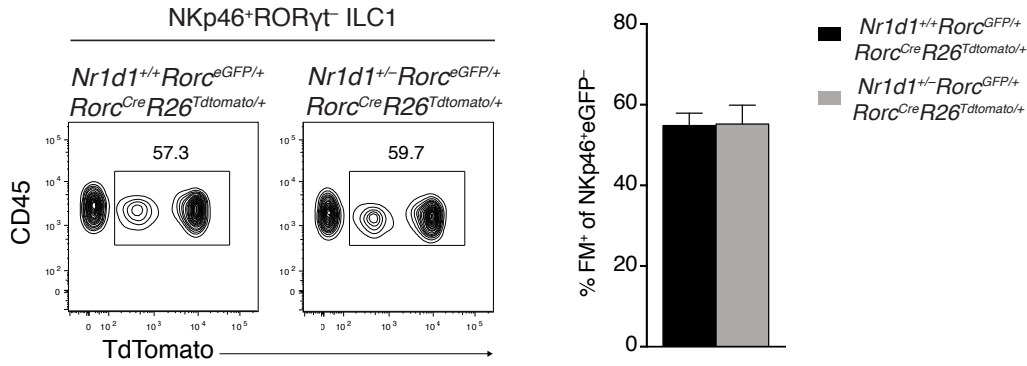

**Figure S6. Reduction of NKp46<sup>+</sup> ILC3 in *Nr1d1*<sup>-/-</sup> mice is not due to increase in plasticity.** Representative plot (left) and frequency (right) of RORyt-FM<sup>+</sup> ILC1s (CD45<sup>+</sup>Lin<sup>-</sup> (CD3/CD5/CD19)<sup>-</sup>RORyt-eGFP<sup>-</sup>NKp46<sup>+</sup>) from siLP of *Nr1d1*<sup>+/+</sup> and *Nr1d1*<sup>-/-</sup> RORyt-reporter-FM mice. Statistical analysis was performed using Student's t-test. Bars indicate mean (±SD). \*, P<0.05; \*\*, P<0.01; \*\*\*, P<0.001. Data are representative of two independent experiments, n=3-4 per genotype per experiment.

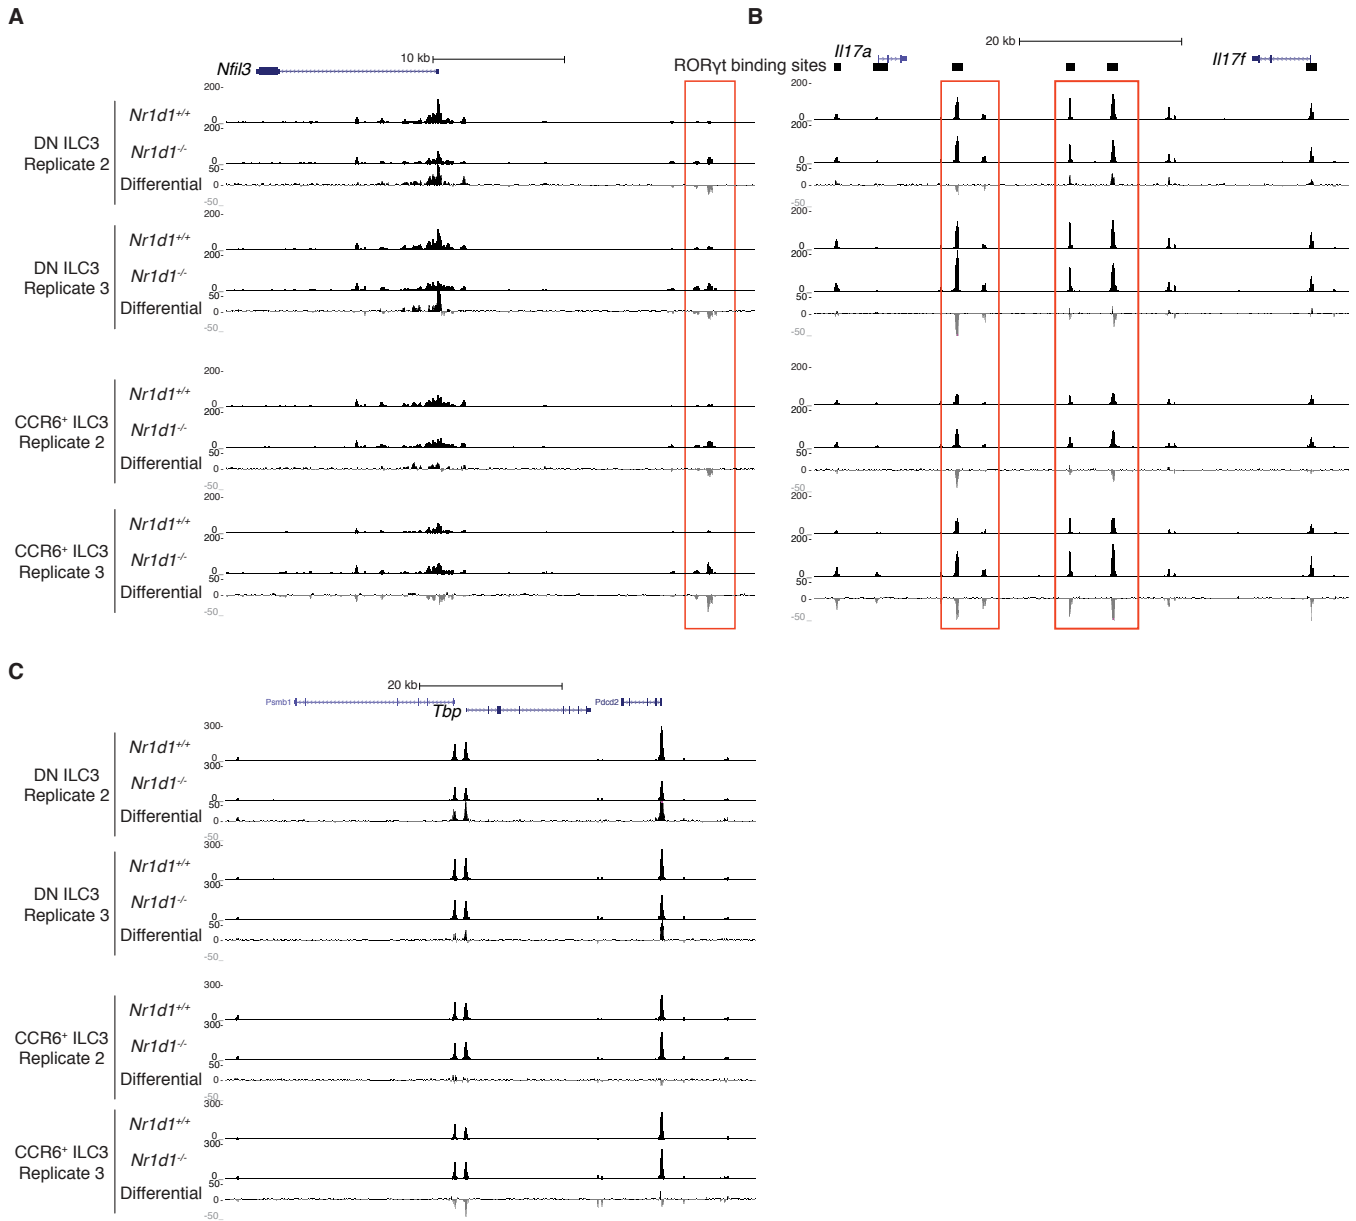

**Figure S7. Accessibility of *Nfil3*, *Il17*, and *Tbp* loci in *Nr1d1*<sup>+/+</sup> and *Nr1d1*<sup>-/-</sup> ILC3s.** UCSC genome browser view of ATAC-seq tracks at the **A)** *Nfil3*, **B)** *Il17*, and **C)** *Tbp* loci in biological replicates of *Nr1d1*<sup>+/+</sup> and *Nr1d1*<sup>-/-</sup> ILC3s.



| Motif Name                                                       | Consensus    | P-value  | Log P-value | q-value (Benjamini) | # of Target Sequences with Motif(of 1138) | % of Target Sequences with Motif | # of Background Sequences with Motif(of 48512) | % of Background Sequences with Motif |
|------------------------------------------------------------------|--------------|----------|-------------|---------------------|-------------------------------------------|----------------------------------|------------------------------------------------|--------------------------------------|
| RORgt(NR)/EL4-RORgt.Flag-ChIP-Seq(GSE56019)/Homer                | AAYTAGGTCA   | 1.00E-79 | -1.84E+02   | 0                   | 208                                       | 18.28%                           | 1780.4                                         | 3.67%                                |
| RUNX1(Runt)/Jurkat-RUNX1-ChIP-Seq(GSE29180)/Homer                | AAACCACARM   | 1.00E-61 | -1.41E+02   | 0                   | 617                                       | 54.22%                           | 14760.2                                        | 30.45%                               |
| RUNX(Runt)/HPC7-Runx1-ChIP-Seq(GSE22178)/Homer                   | SAAACCACAG   | 1.00E-59 | -1.37E+02   | 0                   | 500                                       | 43.94%                           | 10707.5                                        | 22.09%                               |
| RUNX2(Runt)/PCa-RUNX2-ChIP-Seq(GSE33889)/Homer                   | NWAACCACADNN | 1.00E-58 | -1.35E+02   | 0                   | 556                                       | 48.86%                           | 12753.2                                        | 26.31%                               |
| RUNX-AML(Runt)/CD4+-PolII-ChIP-Seq(Barski_et_al.)/Homer          | GCTGTGGTTW   | 1.00E-54 | -1.26E+02   | 0                   | 499                                       | 43.85%                           | 11056.3                                        | 22.81%                               |
| NFkB-p65(RHD)/GM12787-p65-ChIP-Seq(GSE19485)/Homer               | WGGGGATTCC   | 1.00E-52 | -1.21E+02   | 0                   | 355                                       | 31.20%                           | 6563.7                                         | 13.54%                               |
| NFkB-p65-Rel(RHD)/ThioMac-LPS-Expression(GSE23622)/Homer         | GGAAATTCC    | 1.00E-44 | -1.03E+02   | 0                   | 96                                        | 8.44%                            | 637                                            | 1.31%                                |
| NFkB-p50,p52(RHD)/Monocyte-p50-ChIP-Chip(Schreiber_et_al.)/Homer | GGGGGAATCCCC | 1.00E-18 | -4.19E+01   | 0                   | 86                                        | 7.56%                            | 1210.6                                         | 2.50%                                |
| Tcf4(HMG)/Hct116-Tcf4-ChIP-Seq(SRA012054)/Homer                  | ASATCAAAGGVA | 1.00E-15 | -3.67E+01   | 0                   | 253                                       | 22.23%                           | 6441.2                                         | 13.29%                               |
| Atf7(bZIP)/3T3L1-Atf7-ChIP-Seq(GSE56872)/Homer                   | NGRTGACGTCA  | 1.00E-12 | -2.82E+01   | 0                   | 235                                       | 20.65%                           | 6312.2                                         | 13.02%                               |
| Atf2(bZIP)/3T3L1-Atf2-ChIP-Seq(GSE56872)/Homer                   | NRRTGACGTCAT | 1.00E-11 | -2.73E+01   | 0                   | 181                                       | 15.91%                           | 4514.4                                         | 9.31%                                |
| Atf1(bZIP)/K562-ATF1-ChIP-Seq(GSE31477)/Homer                    | GATGACGTCA   | 1.00E-11 | -2.70E+01   | 0                   | 297                                       | 26.10%                           | 8618.8                                         | 17.78%                               |
| c-Jun-CRE(bZIP)/K562-cJun-ChIP-Seq(GSE31477)/Homer               | ATGACGTCATCY | 1.00E-11 | -2.67E+01   | 0                   | 168                                       | 14.76%                           | 4116.1                                         | 8.49%                                |
| Etv2(ETS)/ES-ER71-ChIP-Seq(GSE59402)/Homer(0.967)                | NNAYTTCCTGHN | 1.00E-10 | -2.51E+01   | 0                   | 412                                       | 36.20%                           | 13142.3                                        | 27.12%                               |
| BATF(bZIP)/Th17-BATF-ChIP-Seq(GSE39756)/Homer                    | DATGASTCAT   | 1.00E-10 | -2.39E+01   | 0                   | 286                                       | 25.13%                           | 8442.9                                         | 17.42%                               |
| Egr2(Zf)/Thymocytes-Egr2-ChIP-Seq(GSE34254)/Homer                | NGCGTGGGCGGR | 1.00E-10 | -2.38E+01   | 0                   | 93                                        | 8.17%                            | 1890.4                                         | 3.90%                                |
| Jun-AP1(bZIP)/K562-cJun-ChIP-Seq(GSE31477)/Homer                 | GATGASTCATCN | 1.00E-10 | -2.38E+01   | 0                   | 129                                       | 11.34%                           | 2995.3                                         | 6.18%                                |
| Fosl2(bZIP)/3T3L1-Fosl2-ChIP-Seq(GSE56872)/Homer                 | NATGASTCABNN | 1.00E-09 | -2.29E+01   | 0                   | 168                                       | 14.76%                           | 4322.4                                         | 8.92%                                |

|                                                                 |                |          |           |   |     |        |         |        |
|-----------------------------------------------------------------|----------------|----------|-----------|---|-----|--------|---------|--------|
| ETS:RUNX(ETS,Runt)/Jurkat-RUNX1-ChIP-Seq(GSE17954)/Homer        | RCAGGATGTGGT   | 1.00E-09 | -2.29E+01 | 0 | 69  | 6.06%  | 1239.3  | 2.56%  |
| Fra1(bZIP)/BT549-Fra1-ChIP-Seq(GSE46166)/Homer                  | NNATGASTCATH   | 1.00E-09 | -2.28E+01 | 0 | 245 | 21.53% | 7030.3  | 14.51% |
| PU.1(ETS)/ThioMac-PU.1-ChIP-Seq(GSE21512)/Homer                 | AGAGGAAGTG     | 1.00E-09 | -2.21E+01 | 0 | 250 | 21.97% | 7264.3  | 14.99% |
| Atf3(bZIP)/GBM-ATF3-ChIP-Seq(GSE33912)/Homer                    | DATGASTCATHN   | 1.00E-09 | -2.17E+01 | 0 | 283 | 24.87% | 8513.1  | 17.56% |
| Fra2(bZIP)/Striatum-Fra2-ChIP-Seq(GSE43429)/Homer               | GGATGACTCATC   | 1.00E-09 | -2.12E+01 | 0 | 215 | 18.89% | 6073.9  | 12.53% |
| Ets1-distal(ETS)/CD4+PolII-ChIP-Seq(Barski_et_al.)/Homer        | MACAGGAAGT     | 1.00E-09 | -2.11E+01 | 0 | 182 | 15.99% | 4915.7  | 10.14% |
| EWS:ERG-fusion(ETS)/CADO_ES1-EWS:ERG-ChIP-Seq(SRA014231)/Homer  | ATTCCTGTN      | 1.00E-08 | -2.01E+01 | 0 | 319 | 28.03% | 10010.7 | 20.65% |
| JunB(bZIP)/DendriticCells-Junb-ChIP-Seq(GSE36099)/Homer         | RATGASTCAT     | 1.00E-07 | -1.84E+01 | 0 | 239 | 21.00% | 7160.6  | 14.77% |
| ETS1(ETS)/Jurkat-ETS1-ChIP-Seq(GSE17954)/Homer                  | ACAGGAAGTG     | 1.00E-07 | -1.69E+01 | 0 | 421 | 36.99% | 14339.8 | 29.59% |
| GABPA(ETS)/Jurkat-GABPa-ChIP-Seq(GSE17954)/Homer                | RACCGAAGT      | 1.00E-07 | -1.66E+01 | 0 | 376 | 33.04% | 12577   | 25.95% |
| TCFL2(HMG)/K562-TCF7L2-ChIP-Seq(GSE29196)/Homer                 | ACWTCAAAGG     | 1.00E-07 | -1.64E+01 | 0 | 58  | 5.10%  | 1140    | 2.35%  |
| Tcf3(HMG)/mES-Tcf3-ChIP-Seq(GSE11724)/Homer                     | ASWTCAAAGG     | 1.00E-07 | -1.63E+01 | 0 | 137 | 12.04% | 3672.6  | 7.58%  |
| Gata2(Zf)/K562-GATA2-ChIP-Seq(GSE18829)/Homer                   | BBCTTATCTS     | 1.00E-07 | -1.62E+01 | 0 | 277 | 24.34% | 8785    | 18.13% |
| Fli1(ETS)/CD8-FLI-ChIP-Seq(GSE20898)/Homer                      | NRYTTCCGGH     | 1.00E-06 | -1.54E+01 | 0 | 425 | 37.35% | 14670.3 | 30.27% |
| EWS:FLI1-fusion(ETS)/SK_N_MC-EWS:FLI1-ChIP-Seq(SRA014231)/Homer | VACAGGAAAT     | 1.00E-06 | -1.45E+01 | 0 | 257 | 22.58% | 8188.1  | 16.89% |
| ERG(ETS)/VCaP-ERG-ChIP-Seq(GSE14097)/Homer                      | ACAGGAAGTG     | 1.00E-06 | -1.43E+01 | 0 | 585 | 51.41% | 21425.3 | 44.21% |
| GATA(Zf),IR4/iTreg-Gata3-ChIP-Seq(GSE20898)/Homer               | NAGATWNBATCTNN | 1.00E-06 | -1.41E+01 | 0 | 50  | 4.39%  | 991.1   | 2.04%  |
| AP-1(bZIP)/ThioMac-PU.1-ChIP-Seq(GSE21512)/Homer                | VTGACTCATC     | 1.00E-06 | -1.40E+01 | 0 | 296 | 26.01% | 9740.5  | 20.10% |
| JunD(bZIP)/K562-JunD-ChIP-Seq/Homer                             | ATGACGTCATCN   | 1.00E-06 | -1.40E+01 | 0 | 58  | 5.10%  | 1232.1  | 2.54%  |
| COUP-TFII(NR)/Artia-Nr2f2-ChIP-Seq(GSE46497)/Homer              | AGRGGTCA       | 1.00E-06 | -1.39E+01 | 0 | 605 | 53.16% | 22327.3 | 46.07% |
| Gata6(Zf)/HUG1N-GATA6-ChIP-Seq(GSE51936)/Homer                  | YCTTATCTBN     | 1.00E-05 | -1.37E+01 | 0 | 349 | 30.67% | 11856   | 24.46% |
| IRF2(IRF)/Erythroblasts-IRF2-ChIP-Seq(GSE36985)/Homer           | GAAASYGAAASY   | 1.00E-05 | -1.30E+01 | 0 | 57  | 5.01%  | 1239.9  | 2.56%  |

|                                                            |                      |          |           |        |     |        |         |        |
|------------------------------------------------------------|----------------------|----------|-----------|--------|-----|--------|---------|--------|
| IRF1(IRF)/PBMC-IRF1-ChIP-Seq(GSE43036)/Homer               | GAAAGTGAAAGT         | 1.00E-05 | -1.30E+01 | 0      | 71  | 6.24%  | 1677.8  | 3.46%  |
| Brn1(POU,Homeobox)/NPC-Brn1-ChIP-Seq(GSE35496)/Homer       | TATGCWAATBAV         | 1.00E-05 | -1.25E+01 | 0      | 118 | 10.37% | 3275.6  | 6.76%  |
| Reverb(NR),DR2/RAW-Reverba.biotin-ChIP-Seq(GSE45914)/Homer | GTRGGTCASTGGGTCA     | 1.00E-05 | -1.25E+01 | 0      | 82  | 7.21%  | 2060.2  | 4.25%  |
| X-box(HTH)/NPC-H3K4me1-ChIP-Seq(GSE16256)/Homer            | GGTTGCCATGGCAA       | 1.00E-05 | -1.24E+01 | 0      | 67  | 5.89%  | 1580.3  | 3.26%  |
| Rfx2(HTH)/LoVo-RFX2-ChIP-Seq(GSE49402)/Homer               | GTTGCCATGGCAACM      | 1.00E-05 | -1.16E+01 | 0.0001 | 58  | 5.10%  | 1334.7  | 2.75%  |
| MafA(bZIP)/Islet-MafA-ChIP-Seq(GSE30298)/Homer             | TGCTGACTCA           | 1.00E-04 | -1.13E+01 | 0.0001 | 339 | 29.79% | 11764.9 | 24.27% |
| Rfx1(HTH)/NPC-H3K4me1-ChIP-Seq(GSE16256)/Homer             | KGTTGCCATGGCAA       | 1.00E-04 | -1.11E+01 | 0.0001 | 102 | 8.96%  | 2824.1  | 5.83%  |
| Gata1(Zf)/K562-GATA1-ChIP-Seq(GSE18829)/Homer              | SAGATAAGR            | 1.00E-04 | -1.10E+01 | 0.0001 | 237 | 20.83% | 7813.2  | 16.12% |
| ETV1(ETS)/GIST48-ETV1-ChIP-Seq(GSE22441)/Homer             | AACCGGAAGT           | 1.00E-04 | -1.10E+01 | 0.0001 | 503 | 44.20% | 18490.3 | 38.15% |
| GATA(Zf),IR3/iTreg-Gata3-ChIP-Seq(GSE20898)/Homer          | NNNNNBAGATAWYATCTVHN | 1.00E-04 | -1.07E+01 | 0.0002 | 72  | 6.33%  | 1831.3  | 3.78%  |
| RFX(HTH)/K562-RFX3-ChIP-Seq(SRA012198)/Homer               | CGGTTGCCATGGCAAC     | 1.00E-04 | -1.05E+01 | 0.0002 | 51  | 4.48%  | 1169.4  | 2.41%  |
| RAR:RXR(NR),DR5/ES-RAR-ChIP-Seq(GSE56893)/Homer            | RGGTCADNNAGAGGTC     | 1.00E-04 | -1.02E+01 | 0.0003 | 25  | 2.20%  | 422.7   | 0.87%  |
| Gata4(Zf)/Heart-Gata4-ChIP-Seq(GSE35151)/Homer             | NBWGATAAGR           | 1.00E-04 | -1.00E+01 | 0.0003 | 364 | 31.99% | 12945.3 | 26.71% |
| IRF3(IRF)/BMDM-Irf3-ChIP-Seq(GSE67343)/Homer               | AGTTTCAKTTTC         | 1.00E-04 | -9.45E+00 | 0.0005 | 135 | 11.86% | 4137.9  | 8.54%  |
| IRF4(IRF)/GM12878-IRF4-ChIP-Seq(GSE32465)/Homer            | ACTGAAACCA           | 1.00E-04 | -9.30E+00 | 0.0006 | 178 | 15.64% | 5755    | 11.87% |
| GATA3(Zf),DR8/iTreg-Gata3-ChIP-Seq(GSE20898)/Homer         | AGATSTNDNNDSAGATAASN | 1.00E-03 | -9.02E+00 | 0.0008 | 40  | 3.51%  | 894.3   | 1.85%  |
| Chop(bZIP)/MEF-Chop-ChIP-Seq(GSE35681)/Homer               | ATTGCATCAT           | 1.00E-03 | -9.00E+00 | 0.0008 | 84  | 7.38%  | 2350.9  | 4.85%  |
| CarG(MADS)/PUER-Srf-ChIP-Seq(Sullivan_et_al.)/Homer        | CCATATATGGNM         | 1.00E-03 | -8.60E+00 | 0.0012 | 124 | 10.90% | 3815.3  | 7.87%  |
| Egr1(Zf)/K562-Egr1-ChIP-Seq(GSE32465)/Homer                | TGCGTGGGYG           | 1.00E-03 | -8.49E+00 | 0.0013 | 238 | 20.91% | 8164.3  | 16.84% |
| ISRE(IRF)/ThioMac-LPS-Expression(GSE23622)/Homer           | AGTTTCASTTTC         | 1.00E-03 | -8.39E+00 | 0.0014 | 33  | 2.90%  | 708.7   | 1.46%  |
| Elk1(ETS)/Hela-Elk1-ChIP-Seq(GSE31477)/Homer               | HACTTCCGGY           | 1.00E-03 | -8.37E+00 | 0.0014 | 206 | 18.10% | 6936.9  | 14.31% |
| Esrrb(NR)/mES-Esrrb-ChIP-Seq(GSE11431)/Homer               | KTGACCTTGA           | 1.00E-03 | -8.33E+00 | 0.0014 | 278 | 24.43% | 9762.6  | 20.14% |

|                                                        |                          |          |           |        |     |        |         |        |
|--------------------------------------------------------|--------------------------|----------|-----------|--------|-----|--------|---------|--------|
| bZIP:IRF(bZIP,IRF)/Th17-BatF-ChIP-Seq(GSE39756)/Homer  | NAGTTTCABTHT<br>GACTNW   | 1.00E-03 | -8.01E+00 | 0.0019 | 171 | 15.03% | 5639.1  | 11.63% |
| CRE(bZIP)/Promoter/Homer                               | CSGTGACGTCAC             | 1.00E-03 | -7.85E+00 | 0.0022 | 99  | 8.70%  | 2975.7  | 6.14%  |
| EKLF(Zf)/Erythrocyte-Klf1-ChIP-Seq(GSE20478)/Homer     | NWGGGTGTGGC<br>Y         | 1.00E-03 | -7.78E+00 | 0.0023 | 104 | 9.14%  | 3163.7  | 6.53%  |
| MafK(bZIP)/C2C12-MafK-ChIP-Seq(GSE36030)/Homer         | GCTGASTCAGCA             | 1.00E-03 | -7.68E+00 | 0.0026 | 105 | 9.23%  | 3209.5  | 6.62%  |
| Oct6(POU,Homeobox)/NPC-Pou3f1-ChIP-Seq(GSE35496)/Homer | WATGCAAATGAG             | 1.00E-03 | -7.62E+00 | 0.0027 | 141 | 12.39% | 4549.3  | 9.39%  |
| THRb(NR)/Liver-NR1A2-ChIP-Seq(GSE52613)/Homer          | TRAGGTCA                 | 1.00E-03 | -7.36E+00 | 0.0034 | 962 | 84.53% | 39170   | 80.82% |
| Sp5(Zf)/mES-Sp5.Flag-ChIP-Seq(GSE72989)/Homer          | RGKGGGCGGAG<br>C         | 1.00E-03 | -7.13E+00 | 0.0042 | 309 | 27.15% | 11196.3 | 23.10% |
| KLF6(Zf)/PDAC-KLF6-ChIP-Seq(GSE64557)/Homer            | MKGGGYGTGGC<br>C         | 1.00E-03 | -7.06E+00 | 0.0045 | 346 | 30.40% | 12705.9 | 26.22% |
| Atf4(bZIP)/MEF-Atf4-ChIP-Seq(GSE35681)/Homer           | MTGATGCAAT               | 1.00E-03 | -7.04E+00 | 0.0045 | 98  | 8.61%  | 3015.7  | 6.22%  |
| Mef2a(MADS)/HL1-Mef2a.biotin-ChIP-Seq(GSE21529)/Homer  | CYAAAAATAG               | 1.00E-02 | -6.68E+00 | 0.0064 | 144 | 12.65% | 4774.7  | 9.85%  |
| ELF3(ETS)/PDAC-ELF3-ChIP-Seq(GSE64557)/Homer           | ANCAGGAAGT               | 1.00E-02 | -6.66E+00 | 0.0064 | 292 | 25.66% | 10593.7 | 21.86% |
| E-box(bHLH)/Promoter/Homer                             | SSGGTCACGTGA             | 1.00E-02 | -6.50E+00 | 0.0074 | 36  | 3.16%  | 890.7   | 1.84%  |
| ERE(NR),IR3/MCF7-ERa-ChIP-Seq(Unpublished)/Homer       | VAGGTACNSTG<br>ACC       | 1.00E-02 | -6.30E+00 | 0.0089 | 121 | 10.63% | 3948.9  | 8.15%  |
| KLF3(Zf)/MEF-Klf3-ChIP-Seq(GSE44748)/Homer             | NRGCCCCRCCCH<br>BNN      | 1.00E-02 | -6.29E+00 | 0.0089 | 181 | 15.91% | 6252.6  | 12.90% |
| MITF(bHLH)/MastCells-MITF-ChIP-Seq(GSE48085)/Homer     | RTCATGTGAC               | 1.00E-02 | -5.97E+00 | 0.0121 | 353 | 31.02% | 13202.6 | 27.24% |
| Pdx1(Homeobox)/Islet-Pdx1-ChIP-Seq(SRA008281)/Homer    | YCATYAATCA               | 1.00E-02 | -5.66E+00 | 0.0163 | 312 | 27.42% | 11591.9 | 23.92% |
| GATA3(Zf)/iTreg-Gata3-ChIP-Seq(GSE20898)/Homer         | AGATAASR                 | 1.00E-02 | -5.63E+00 | 0.0166 | 480 | 42.18% | 18536.9 | 38.25% |
| CEBP:AP1(bZIP)/ThioMac-CEBPb-ChIP-Seq(GSE21512)/Homer  | DRTGTTGCAA               | 1.00E-02 | -5.59E+00 | 0.017  | 253 | 22.23% | 9220.5  | 19.02% |
| Bach2(bZIP)/OCILy7-Bach2-ChIP-Seq(GSE44420)/Homer      | TGCTGAGTCA               | 1.00E-02 | -5.47E+00 | 0.019  | 83  | 7.29%  | 2622.1  | 5.41%  |
| Mef2d(MADS)/Retina-Mef2d-ChIP-Seq(GSE61391)/Homer      | GCTATTTTAGC              | 1.00E-02 | -5.44E+00 | 0.0194 | 65  | 5.71%  | 1967.7  | 4.06%  |
| IRF8(IRF)/BMDM-IRF8-ChIP-Seq(GSE77884)/Homer           | GRAASTGAAAST             | 1.00E-02 | -5.40E+00 | 0.0199 | 120 | 10.54% | 4022.7  | 8.30%  |
| Elk4(ETS)/Hela-Elk4-ChIP-Seq(GSE31477)/Homer           | NRYTTCCGGY               | 1.00E-02 | -5.39E+00 | 0.0199 | 194 | 17.05% | 6904.6  | 14.25% |
| MafB(bZIP)/BMM-MafB-ChIP-Seq(GSE75722)/Homer           | WNTGCTGASTCA<br>GCANWTTY | 1.00E-02 | -5.17E+00 | 0.0243 | 163 | 14.32% | 5719.2  | 11.80% |

|                                                        |                               |          |           |        |     |        |         |        |
|--------------------------------------------------------|-------------------------------|----------|-----------|--------|-----|--------|---------|--------|
| Mef2b(MADS)/HEK293-Mef2b.V5-ChIP-Seq(GSE67450)/Homer   | GCTATTTTTGGM                  | 1.00E-02 | -5.12E+00 | 0.0253 | 252 | 22.14% | 9269.1  | 19.12% |
| VDR(NR),DR3/GM1085 5-VDR+vitD-ChIP-Seq(GSE22484)/Homer | ARAGGTCANWGA<br>GTTCANNN      | 1.00E-02 | -5.04E+00 | 0.0271 | 96  | 8.44%  | 3156.6  | 6.51%  |
| ELF1(ETS)/Jurkat-ELF1-ChIP-Seq(SRA014231)/Homer        | AVCCGGAAGT                    | 1.00E-02 | -5.00E+00 | 0.028  | 186 | 16.34% | 6654.6  | 13.73% |
| EHF(ETS)/LoVo-EHF-ChIP-Seq(GSE49402)/Homer             | AVCAGGAAGT                    | 1.00E-02 | -5.00E+00 | 0.028  | 455 | 39.98% | 17642   | 36.40% |
| Srebp2(bHLH)/HepG2-Srebp2-ChIP-Seq(GSE31477)/Homer     | CGGTCACSCCAC                  | 1.00E-02 | -4.98E+00 | 0.028  | 63  | 5.54%  | 1938    | 4.00%  |
| MafF(bZIP)/HepG2-MafF-ChIP-Seq(GSE31477)/Homer         | HWWGTCAGCAW<br>WTTT           | 1.00E-02 | -4.94E+00 | 0.0287 | 97  | 8.52%  | 3206.2  | 6.62%  |
| ZNF136(Zf)/HEK293-ZNF136.GFP-ChIP-Seq(GSE58341)/Homer  | YTKGATAHAGTAT<br>TCTWGGTNGGCA | 1.00E-02 | -4.93E+00 | 0.0287 | 40  | 3.51%  | 1122.3  | 2.32%  |
| ELF5(ETS)/T47D-ELF5-ChIP-Seq(GSE30407)/Homer           | ACVAGGAAGT                    | 1.00E-02 | -4.93E+00 | 0.0287 | 280 | 24.60% | 10441.5 | 21.54% |
| Nrf2(bZIP)/Lymphoblast-Nrf2-ChIP-Seq(GSE37589)/Homer   | HTGCTGAGTCAT                  | 1.00E-02 | -4.74E+00 | 0.0337 | 24  | 2.11%  | 595.7   | 1.23%  |
| Rfx5(HTH)/GM12878-Rfx5-ChIP-Seq(GSE31477)/Homer        | SCCTAGCAACAG                  | 1.00E-02 | -4.72E+00 | 0.0343 | 133 | 11.69% | 4619.7  | 9.53%  |

**Table S1. Motif enrichment of known motifs by HOMER in *Nr1d1*<sup>+/+</sup> NKp46<sup>-</sup> ILC3s.**

| Rank | Motif        | Best match                                                                              | P-value   | Log P-value | # of Target Sequences with Motif(of 1138) | % of Target Sequences with Motif | # of Background Sequences with Motif(of 48512) | % of Background Sequences with Motif |
|------|--------------|-----------------------------------------------------------------------------------------|-----------|-------------|-------------------------------------------|----------------------------------|------------------------------------------------|--------------------------------------|
| 1    | AWBTAGGTCA   | RORgt(NR)/EL4-RORgt.Flag-ChIP-Seq(GSE56019)/Homer(0.976)                                | 1.00E-108 | -250.39     | 495                                       | 43.50%                           | 7614.6                                         | 15.71%                               |
| 2    | GGAAATCCCC   | MF0003.1_REL_class/Jaspar(0.976)                                                        | 1.00E-85  | -196.83     | 341                                       | 29.96%                           | 4498.2                                         | 9.28%                                |
| 3    | NNHRACCACA   | RUNX2(Runt)/PCa-RUNX2-ChIP-Seq(GSE33889)/Homer(0.938)                                   | 1.00E-67  | -155.98     | 464                                       | 40.77%                           | 8934.4                                         | 18.43%                               |
| 4    | AATCATAATAAC | PB0064.1_Sox14_1/Jaspar(0.712)                                                          | 1.00E-18  | -41.74      | 10                                        | 0.88%                            | 3.5                                            | 0.01%                                |
| 5    | CTTTGAWCTT   | TCF7L2/MA0523.1/Jaspar(0.930)                                                           | 1.00E-17  | -40.78      | 212                                       | 18.63%                           | 4874.8                                         | 10.06%                               |
| 6    | GCCAAAGGGTTA | PB0191.1_Tcfap2c_2/Jaspar(0.625)                                                        | 1.00E-15  | -35.14      | 8                                         | 0.70%                            | 2.8                                            | 0.01%                                |
| 7    | AWTAGGACGG   | 8-<br>AWTAGGACGG,BestGuess:ZNF382(Zf)/HEK293-ZNF382.GFP-ChIP-Seq(GSE58341)/Homer(0.649) | 1.00E-15  | -34.66      | 161                                       | 14.15%                           | 3523                                           | 7.27%                                |
| 8    | TTCAAAAAGTGC | 13-<br>TTCAAAAAGTGC,BestGuess:PB0146.1_Mafk_2/Jaspar(0.684)                             | 1.00E-13  | -30.17      | 81                                        | 7.12%                            | 1357.2                                         | 2.80%                                |
| 9    | AGTGA CT CAC | 10-<br>AGTGA CT CAC,BestGuess:FOSL1/MA0477.1/Jaspar(0.850)                              | 1.00E-12  | -27.92      | 101                                       | 8.88%                            | 1978.9                                         | 4.08%                                |

**Table S2. De novo motif enrichment by HOMER in *Nr1d1*<sup>+/+</sup> NKp46<sup>-</sup> ILC3s.**

| Motif Name                                                      | Consensus        | P-value  | Log P-value | q-value (Benjamini) | # of Target Sequences with Motif (of 926) | % of Target Sequences with Motif | # of Background Sequences with Motif (of 48705) | % of Background Sequences with Motif |
|-----------------------------------------------------------------|------------------|----------|-------------|---------------------|-------------------------------------------|----------------------------------|-------------------------------------------------|--------------------------------------|
| Etv2(ETS)/ES-ER71-ChIP-Seq(GSE59402)/Homer(0.967)               | NNAYTTCCTGHN     | 1.00E-61 | -1.41E+02   | 0                   | 517                                       | 55.83%                           | 14392.3                                         | 29.55%                               |
| ETS1(ETS)/Jurkat-ETS1-ChIP-Seq(GSE17954)/Homer                  | ACAGGAAGTG       | 1.00E-55 | -1.27E+02   | 0                   | 529                                       | 57.13%                           | 15565.5                                         | 31.95%                               |
| Ets1-distal(ETS)/CD4+PolII-ChIP-Seq(Barski et al.)/Homer        | MACAGGAAGT       | 1.00E-53 | -1.22E+02   | 0                   | 278                                       | 30.02%                           | 5475.8                                          | 11.24%                               |
| Fli1(ETS)/CD8-FLI-ChIP-Seq(GSE20898)/Homer                      | NRYTTCCGGH       | 1.00E-51 | -1.18E+02   | 0                   | 522                                       | 56.37%                           | 15647.7                                         | 32.12%                               |
| EWS:ERG-fusion(ETS)/CADO_ES1-EWS:ERG-ChIP-Seq(SRA014231)/Homer  | ATTCCTGTN        | 1.00E-50 | -1.16E+02   | 0                   | 424                                       | 45.79%                           | 11333.1                                         | 23.27%                               |
| NF1(CTF)/LNCAP-NF1-ChIP-Seq(Unpublished)/Homer                  | CYTGGCABNSTGCCAR | 1.00E-48 | -1.13E+02   | 0                   | 281                                       | 30.35%                           | 5857.2                                          | 12.02%                               |
| EWS:FLI1-fusion(ETS)/SK_N_MC-EWS:FLI1-ChIP-Seq(SRA014231)/Homer | VACAGGAAAT       | 1.00E-44 | -1.03E+02   | 0                   | 358                                       | 38.66%                           | 9103.4                                          | 18.69%                               |
| ERG(ETS)/VCaP-ERG-ChIP-Seq(GSE14097)/Homer                      | ACAGGAAGTG       | 1.00E-40 | -9.26E+01   | 0                   | 642                                       | 69.33%                           | 23169.8                                         | 47.57%                               |
| GABPA(ETS)/Jurkat-GABPa-ChIP-Seq(GSE17954)/Homer                | RACCGGAAGT       | 1.00E-38 | -8.96E+01   | 0                   | 448                                       | 48.38%                           | 13609                                           | 27.94%                               |
| RUNX1(Runt)/Jurkat-RUNX1-ChIP-Seq(GSE29180)/Homer               | AAACCACARM       | 1.00E-38 | -8.96E+01   | 0                   | 493                                       | 53.24%                           | 15713.9                                         | 32.26%                               |
| ETV1(ETS)/GIST48-ETV1-ChIP-Seq(GSE22441)/Homer                  | AACCGGAAGT       | 1.00E-38 | -8.88E+01   | 0                   | 576                                       | 62.20%                           | 19884.7                                         | 40.82%                               |
| RUNX(Runt)/HPC7-Runx1-ChIP-Seq(GSE22178)/Homer                  | SAAACCACAG       | 1.00E-38 | -8.86E+01   | 0                   | 398                                       | 42.98%                           | 11429.1                                         | 23.46%                               |
| Fra1(bZIP)/BT549-Fra1-ChIP-Seq(GSE46166)/Homer                  | NNATGASTCATH     | 1.00E-37 | -8.54E+01   | 0                   | 309                                       | 33.37%                           | 7874.5                                          | 16.17%                               |
| Fra2(bZIP)/Striatum-Fra2-ChIP-Seq(GSE43429)/Homer               | GGATGACTCATC     | 1.00E-36 | -8.38E+01   | 0                   | 281                                       | 30.35%                           | 6847.9                                          | 14.06%                               |
| ETS:RUNX(ETS,Runt)/Jurkat-RUNX1-ChIP-Seq(GSE17954)/Homer        | RCAGGATGTGGT     | 1.00E-35 | -8.25E+01   | 0                   | 108                                       | 11.66%                           | 1308                                            | 2.69%                                |
| Atf3(bZIP)/GBM-ATF3-ChIP-Seq(GSE33912)/Homer                    | DATGASTCATHN     | 1.00E-35 | -8.13E+01   | 0                   | 342                                       | 36.93%                           | 9389.4                                          | 19.28%                               |
| Jun-AP1(bZIP)/K562-cJun-ChIP-Seq(GSE31477)/Homer                | GATGASTCATCN     | 1.00E-34 | -8.05E+01   | 0                   | 181                                       | 19.55%                           | 3423.2                                          | 7.03%                                |
| JunB(bZIP)/DendriticCells-Junb-ChIP-Seq(GSE36099)/Homer         | RATGASTCAT       | 1.00E-34 | -7.93E+01   | 0                   | 303                                       | 32.72%                           | 7892.6                                          | 16.20%                               |
| Fosl2(bZIP)/3T3L1-Fosl2-ChIP-Seq(GSE56872)/Homer                | NATGASTCABNN     | 1.00E-33 | -7.82E+01   | 0                   | 223                                       | 24.08%                           | 4912.4                                          | 10.08%                               |
| AP-1(bZIP)/ThioMac-PU.1-ChIP-Seq(GSE21512)/Homer                | VTGACTCATC       | 1.00E-32 | -7.44E+01   | 0                   | 366                                       | 39.52%                           | 10746                                           | 22.06%                               |

|                                                        |                     |          |           |   |     |        |         |        |
|--------------------------------------------------------|---------------------|----------|-----------|---|-----|--------|---------|--------|
| BATF(bZIP)/Th17-BATF-ChIP-Seq(GSE39756)/Homer          | DATGASTCAT          | 1.00E-31 | -7.20E+01 | 0 | 330 | 35.64% | 9331.6  | 19.16% |
| RUNX2(Runt)/PCa-RUNX2-ChIP-Seq(GSE33889)/Homer         | NWAACCACADN<br>N    | 1.00E-31 | -7.17E+01 | 0 | 425 | 45.90% | 13535.9 | 27.79% |
| PU.1(ETS)/ThioMac-PU.1-ChIP-Seq(GSE21512)/Homer        | AGAGGAAGTG          | 1.00E-30 | -6.92E+01 | 0 | 289 | 31.21% | 7779.1  | 15.97% |
| RORgt(NR)/EL4-RORgt.Flag-ChIP-Seq(GSE56019)/Homer      | AAAYTAGGTCA         | 1.00E-30 | -6.92E+01 | 0 | 123 | 13.28% | 1943    | 3.99%  |
| Elk1(ETS)/Hela-Elk1-ChIP-Seq(GSE31477)/Homer           | HACTTCCGGY          | 1.00E-29 | -6.87E+01 | 0 | 274 | 29.59% | 7203.9  | 14.79% |
| RUNX-AML(Runt)/CD4+PolII-ChIP-Seq(Barski_et_al.)/Homer | GCTGTGGTTW          | 1.00E-29 | -6.81E+01 | 0 | 386 | 41.68% | 11968.9 | 24.57% |
| Elk4(ETS)/Hela-Elk4-ChIP-Seq(GSE31477)/Homer           | NRYTCCGGY           | 1.00E-27 | -6.36E+01 | 0 | 263 | 28.40% | 6995.2  | 14.36% |
| ETS(ETS)/Promoter/Homer                                | AACCGGAAGT          | 1.00E-27 | -6.30E+01 | 0 | 197 | 21.27% | 4523.1  | 9.29%  |
| ELF3(ETS)/PDAC-ELF3-ChIP-Seq(GSE64557)/Homer           | ANCAGGAAGT          | 1.00E-25 | -5.91E+01 | 0 | 366 | 39.52% | 11600.9 | 23.82% |
| ELF1(ETS)/Jurkat-ELF1-ChIP-Seq(SRA014231)/Homer        | AVCCGGAAGT          | 1.00E-24 | -5.61E+01 | 0 | 252 | 27.21% | 6913.2  | 14.19% |
| Tlx?(NR)/NPC-H3K4me1-ChIP-Seq(GSE16256)/Homer          | CTGGCAGSCTG<br>CCA  | 1.00E-23 | -5.41E+01 | 0 | 253 | 27.32% | 7050.8  | 14.47% |
| Bach2(bZIP)/OCILy7-Bach2-ChIP-Seq(GSE44420)/Homer      | TGCTGAGTCA          | 1.00E-21 | -5.04E+01 | 0 | 142 | 15.33% | 3045    | 6.25%  |
| EHF(ETS)/LoVo-EHF-ChIP-Seq(GSE49402)/Homer             | AVCAGGAAGT          | 1.00E-20 | -4.81E+01 | 0 | 505 | 54.54% | 19024.8 | 39.06% |
| ELF5(ETS)/T47D-ELF5-ChIP-Seq(GSE30407)/Homer           | ACVAGGAAGT          | 1.00E-16 | -3.91E+01 | 0 | 331 | 35.75% | 11354.2 | 23.31% |
| SPDEF(ETS)/VCaP-SPDEF-ChIP-Seq(SRA014231)/Homer        | ASWTCCTGBT          | 1.00E-14 | -3.31E+01 | 0 | 414 | 44.71% | 15789.2 | 32.41% |
| USF1(bHLH)/GM12878-Usf1-ChIP-Seq(GSE32465)/Homer       | SGTCACGTGR          | 1.00E-10 | -2.35E+01 | 0 | 191 | 20.63% | 6321.2  | 12.98% |
| HLF(bZIP)/HSC-HLF.Flag-ChIP-Seq(GSE69817)/Homer        | RTTATGYAAB          | 1.00E-10 | -2.32E+01 | 0 | 287 | 30.99% | 10670.8 | 21.91% |
| c-Myc(bHLH)/LNCAP-cMyc-ChIP-Seq(Unpublished)/Homer     | VCCACGTG            | 1.00E-10 | -2.31E+01 | 0 | 164 | 17.71% | 5203.3  | 10.68% |
| SpiB(ETS)/OCILY3-SPIB-ChIP-Seq(GSE56857)/Homer         | AAAGRGAAGT<br>G     | 1.00E-09 | -2.30E+01 | 0 | 122 | 13.17% | 3494.3  | 7.17%  |
| bHLHE40(bHLH)/HepG2-BHLHE40-ChIP-Seq(GSE31477)/Homer   | KCACGTGMCN          | 1.00E-09 | -2.29E+01 | 0 | 132 | 14.25% | 3895.5  | 8.00%  |
| CLOCK(bHLH)/Liver-Clock-ChIP-Seq(GSE39860)/Homer       | GHCACGTG            | 1.00E-09 | -2.11E+01 | 0 | 223 | 24.08% | 7927.4  | 16.27% |
| MafK(bZIP)/C2C12-MafK-ChIP-Seq(GSE36030)/Homer         | GCTGASTCAGC<br>A    | 1.00E-08 | -2.02E+01 | 0 | 121 | 13.07% | 3623.7  | 7.44%  |
| Bach1(bZIP)/K562-Bach1-ChIP-Seq(GSE31477)/Homer        | AWWNTGCTGA<br>GTCAT | 1.00E-08 | -1.85E+01 | 0 | 43  | 4.64%  | 835.3   | 1.71%  |
| MITF(bHLH)/MastCells-MITF-ChIP-Seq(GSE48085)/Homer     | RTCATGTGAC          | 1.00E-07 | -1.76E+01 | 0 | 350 | 37.80% | 14302   | 29.36% |



|                                                            |                      |          |           |        |     |        |         |        |
|------------------------------------------------------------|----------------------|----------|-----------|--------|-----|--------|---------|--------|
| NF1-halflsite(CTF)/LNCaP-NF1-ChIP-Seq(Unpublished)/Homer   | YTGCCAAG             | 1.00E-06 | -1.61E+01 | 0      | 537 | 57.99% | 24076.9 | 49.43% |
| IRF3(IRF)/BMDM-Irf3-ChIP-Seq(GSE67343)/Homer               | AGTTTCAKTTTC         | 1.00E-06 | -1.57E+01 | 0      | 134 | 14.47% | 4482.6  | 9.20%  |
| Reverb(NR),DR2/RAW-Reverba.biotin-ChIP-Seq(GSE45914)/Homer | GTRGGTCASTG<br>GGTCA | 1.00E-06 | -1.49E+01 | 0      | 82  | 8.86%  | 2395.7  | 4.92%  |
| NPAS2(bHLH)/Liver-NPAS2-ChIP-Seq(GSE39860)/Homer           | KCCACGTGAC           | 1.00E-06 | -1.46E+01 | 0      | 379 | 40.93% | 16146.6 | 33.15% |
| MafF(bZIP)/HepG2-MafF-ChIP-Seq(GSE31477)/Homer             | HWWGTCAGCA<br>WTTTT  | 1.00E-06 | -1.41E+01 | 0      | 109 | 11.77% | 3549.8  | 7.29%  |
| Max(bHLH)/K562-Max-ChIP-Seq(GSE31477)/Homer                | RCCACGTGGYY<br>N     | 1.00E-05 | -1.36E+01 | 0      | 249 | 26.89% | 9936.6  | 20.40% |
| ETS:E-box(ETS,bHLH)/HPC7-Scl-ChIP-Seq(GSE22178)/Homer      | AGGAARCAGCT<br>G     | 1.00E-05 | -1.36E+01 | 0      | 62  | 6.70%  | 1696.4  | 3.48%  |
| IRF4(IRF)/GM12878-IRF4-ChIP-Seq(GSE32465)/Homer            | ACTGAAACCA           | 1.00E-05 | -1.32E+01 | 0      | 167 | 18.03% | 6166.8  | 12.66% |
| Usf2(bHLH)/C2C12-Usf2-ChIP-Seq(GSE36030)/Homer             | GTCACGTGGT           | 1.00E-05 | -1.31E+01 | 0      | 132 | 14.25% | 4624.1  | 9.49%  |
| Atf1(bZIP)/K562-ATF1-ChIP-Seq(GSE31477)/Homer              | GATGACGTCA           | 1.00E-05 | -1.28E+01 | 0      | 238 | 25.70% | 9510.8  | 19.52% |
| Atf2(bZIP)/3T3L1-Atf2-ChIP-Seq(GSE56872)/Homer             | NRRTGACGTCA<br>T     | 1.00E-05 | -1.26E+01 | 0      | 140 | 15.12% | 5021.5  | 10.31% |
| NF-E2(bZIP)/K562-NFE2-ChIP-Seq(GSE31477)/Homer             | GATGACTCAGC<br>A     | 1.00E-05 | -1.15E+01 | 0.0001 | 38  | 4.10%  | 913.3   | 1.88%  |
| Rfx5(HTH)/GM12878-Rfx5-ChIP-Seq(GSE31477)/Homer            | SCCTAGCAACA<br>G     | 1.00E-04 | -1.14E+01 | 0.0001 | 137 | 14.79% | 5012.5  | 10.29% |
| n-Myc(bHLH)/mES-nMyc-ChIP-Seq(GSE11431)/Homer              | VRCCACGTGG           | 1.00E-04 | -1.12E+01 | 0.0001 | 239 | 25.81% | 9769.6  | 20.06% |
| Tcf4(HMG)/Hct116-Tcf4-ChIP-Seq(SRA012054)/Homer            | ASATCAAAGGV<br>A     | 1.00E-04 | -1.06E+01 | 0.0002 | 182 | 19.65% | 7158.1  | 14.69% |
| E-box(bHLH)/Promoter/Home                                  | SSGGTCACGTG<br>A     | 1.00E-04 | -1.05E+01 | 0.0002 | 36  | 3.89%  | 885.9   | 1.82%  |
| Nrf2(bZIP)/Lymphoblast-Nrf2-ChIP-Seq(GSE37589)/Homer       | HTGCTGAGTCA<br>T     | 1.00E-04 | -1.05E+01 | 0.0002 | 32  | 3.46%  | 747.8   | 1.54%  |
| STAT5(Stat)/mCD4+-Stat5-ChIP-Seq(GSE12346)/Homer           | RTTTCTNAGAAA         | 1.00E-04 | -1.04E+01 | 0.0002 | 144 | 15.55% | 5430.6  | 11.15% |
| Atf7(bZIP)/3T3L1-Atf7-ChIP-Seq(GSE56872)/Homer             | NGRTGACGTCA<br>Y     | 1.00E-04 | -1.04E+01 | 0.0002 | 175 | 18.90% | 6862.2  | 14.09% |
| FOXP1(Forkhead)/H9-FOXP1-ChIP-Seq(GSE31006)/Homer          | NYYTGTTTACHN         | 1.00E-04 | -1.03E+01 | 0.0002 | 165 | 17.82% | 6412.1  | 13.16% |
| MafA(bZIP)/Islet-MafA-ChIP-Seq(GSE30298)/Homer             | TGCTGACTCA           | 1.00E-04 | -1.01E+01 | 0.0002 | 305 | 32.94% | 13172.5 | 27.04% |
| NPAS(bHLH)/Liver-NPAS-ChIP-Seq(GSE39860)/Homer             | NVCACGTG             | 1.00E-04 | -9.60E+00 | 0.0004 | 477 | 51.51% | 22018   | 45.20% |

|                                                                  |                          |          |           |        |     |        |         |        |
|------------------------------------------------------------------|--------------------------|----------|-----------|--------|-----|--------|---------|--------|
| Gata2(Zf)/K562-GATA2-ChIP-Seq(GSE18829)/Homer                    | BBCTTATCTS               | 1.00E-04 | -9.45E+00 | 0.0004 | 231 | 24.95% | 9648.8  | 19.81% |
| MafB(bZIP)/BMM-MafB-ChIP-Seq(GSE75722)/Homer                     | WNTGCTGASTC<br>AGCANWTTY | 1.00E-04 | -9.38E+00 | 0.0005 | 166 | 17.93% | 6570    | 13.49% |
| BMAL1(bHLH)/Liver-Bmal1-ChIP-Seq(GSE39860)/Homer                 | GNCACGTG                 | 1.00E-03 | -9.05E+00 | 0.0006 | 527 | 56.91% | 24757.9 | 50.83% |
| PU.1-IRF(ETS:IRF)/Bcell-PU.1-ChIP-Seq(GSE21512)/Homer            | MGGAAGTGAAA<br>C         | 1.00E-03 | -8.72E+00 | 0.0008 | 411 | 44.38% | 18773.1 | 38.54% |
| c-Jun-CRE(bZIP)/K562-cJun-ChIP-Seq(GSE31477)/Homer               | ATGACGTCATC<br>Y         | 1.00E-03 | -8.50E+00 | 0.001  | 119 | 12.85% | 4515.6  | 9.27%  |
| NFKB-p50,p52(RHD)/Monocyte-p50-ChIP-Chip(Schreiber_et_al.)/Homer | GGGGGAATCCC<br>C         | 1.00E-03 | -8.49E+00 | 0.001  | 42  | 4.54%  | 1213.2  | 2.49%  |
| ISRE(IRF)/ThioMac-LPS-Expression(GSE23622)/Homer                 | AGTTTCASTTTC             | 1.00E-03 | -8.41E+00 | 0.0011 | 30  | 3.24%  | 765.9   | 1.57%  |
| GATA(Zf),IR4/iTreg-Gata3-ChIP-Seq(GSE20898)/Homer                | NAGATWNBNA<br>CTNN       | 1.00E-03 | -8.37E+00 | 0.0011 | 41  | 4.43%  | 1181.4  | 2.43%  |
| PRDM1(Zf)/Hela-PRDM1-ChIP-Seq(GSE31477)/Homer                    | ACTTTCACTTTC             | 1.00E-03 | -8.31E+00 | 0.0012 | 189 | 20.41% | 7806.4  | 16.03% |
| Gata1(Zf)/K562-GATA1-ChIP-Seq(GSE18829)/Homer                    | SAGATAAGRV               | 1.00E-03 | -8.12E+00 | 0.0014 | 206 | 22.25% | 8653    | 17.76% |
| NFAT:AP1(RHD,bZIP)/Jurkat-NFATC1-ChIP-Seq(Jolma_et_al.)/Homer    | SARTGGAAA<br>AWRTGAGTCAB | 1.00E-03 | -8.03E+00 | 0.0015 | 74  | 7.99%  | 2568.8  | 5.27%  |
| PAX5(Paired,Homeobox)/GM12878-PAX5-ChIP-Seq(GSE32465)/Homer      | GCAGCCAAGCR<br>TGACH     | 1.00E-03 | -7.96E+00 | 0.0016 | 136 | 14.69% | 5361.1  | 11.01% |
| Tcf3(HMG)/mES-Tcf3-ChIP-Seq(GSE11724)/Homer                      | ASWTCAAAGG               | 1.00E-03 | -7.74E+00 | 0.002  | 108 | 11.66% | 4105.9  | 8.43%  |
| ZNF322(Zf)/HEK293-ZNF322.GFP-ChIP-Seq(GSE58341)/Homer            | GAGCCTGGTAC<br>TGWGCCTGR | 1.00E-03 | -7.52E+00 | 0.0025 | 122 | 13.17% | 4771.2  | 9.79%  |
| FOXP2(Forkhead)/U2OS-FOXP2-ChIP-Seq(E-MTAB-2204)/Homer           | SCHTGTTTACAT             | 1.00E-03 | -7.32E+00 | 0.003  | 221 | 23.87% | 9514.8  | 19.53% |
| Hoxc9(Homeobox)/Ainv15-Hoxc9-ChIP-Seq(GSE21812)/Homer            | GGCCATAAATC<br>A         | 1.00E-03 | -7.18E+00 | 0.0034 | 157 | 16.95% | 6457.2  | 13.26% |
| TCFL2(HMG)/K562-TCF7L2-ChIP-Seq(GSE29196)/Homer                  | ACWTCAAAGG               | 1.00E-03 | -7.15E+00 | 0.0035 | 43  | 4.64%  | 1339.1  | 2.75%  |
| TFE3(bHLH)/MEF-TFE3-ChIP-Seq(GSE75757)/Homer                     | GTCACGTGACY<br>V         | 1.00E-03 | -7.13E+00 | 0.0035 | 39  | 4.21%  | 1179.7  | 2.42%  |
| X-box(HTH)/NPC-H3K4me1-ChIP-Seq(GSE16256)/Homer                  | GGTTGCCATGG<br>CAA       | 1.00E-03 | -7.04E+00 | 0.0038 | 54  | 5.83%  | 1802.4  | 3.70%  |
| IRF8(IRF)/BMDM-IRF8-ChIP-Seq(GSE77884)/Homer                     | GRAASTGAAAST             | 1.00E-03 | -6.96E+00 | 0.004  | 113 | 12.20% | 4429.5  | 9.09%  |
| PU.1:IRF8(ETS:IRF)/pDC-Irf8-ChIP-Seq(GSE66899)/Homer             | GGAAGTGAAS<br>T          | 1.00E-03 | -6.91E+00 | 0.0042 | 78  | 8.42%  | 2852.8  | 5.86%  |
| Pax8(Paired,Homeobox)/Thyroid-Pax8-ChIP-Seq(GSE26938)/Homer      | GTCATGCHTGR<br>CTGS      | 1.00E-02 | -6.90E+00 | 0.0042 | 126 | 13.61% | 5040.4  | 10.35% |

|                                                             |                      |          |           |        |     |        |         |        |
|-------------------------------------------------------------|----------------------|----------|-----------|--------|-----|--------|---------|--------|
| Foxa3(Forkhead)/Liver-Foxa3-ChIP-Seq(GSE77670)/Homer        | BSNTGTTTACWYWGN      | 1.00E-02 | -6.78E+00 | 0.0046 | 120 | 12.96% | 4777.2  | 9.81%  |
| IRF2(IRF)/Erythroblas-IRF2-ChIP-Seq(GSE36985)/Homer         | GAAASYGAAASY         | 1.00E-02 | -6.71E+00 | 0.0049 | 42  | 4.54%  | 1329.1  | 2.73%  |
| JunD(bZIP)/K562-JunD-ChIP-Seq/Homer                         | ATGACGTCATCN         | 1.00E-02 | -6.63E+00 | 0.0053 | 42  | 4.54%  | 1335.8  | 2.74%  |
| E2F4(E2F)/K562-E2F4-ChIP-Seq(GSE31477)/Homer                | GGCGGGAAAH           | 1.00E-02 | -6.23E+00 | 0.0078 | 76  | 8.21%  | 2837.6  | 5.83%  |
| c-Myc(bHLH)/mES-cMyc-ChIP-Seq(GSE11431)/Homer               | VVCCACGTGG           | 1.00E-02 | -6.13E+00 | 0.0085 | 172 | 18.57% | 7346.4  | 15.08% |
| Gata6(Zf)/HUG1N-GATA6-ChIP-Seq(GSE51936)/Homer              | YCTTATCTBN           | 1.00E-02 | -6.00E+00 | 0.0096 | 286 | 30.89% | 13003.2 | 26.69% |
| CEBP(bZIP)/ThioMac-CEBPb-ChIP-Seq(GSE21512)/Homer           | ATTGCGCAAC           | 1.00E-02 | -5.79E+00 | 0.0117 | 184 | 19.87% | 7991.7  | 16.41% |
| Stat3+il21(Stat)/CD4-Stat3-ChIP-Seq(GSE19198)/Homer         | SVYTTCCNGGAR         | 1.00E-02 | -5.75E+00 | 0.012  | 241 | 26.03% | 10806.5 | 22.18% |
| STAT1(Stat)/HelaS3-STAT1-ChIP-Seq(GSE12782)/Homer           | NATTTCCNGGAAAT       | 1.00E-02 | -5.69E+00 | 0.0126 | 111 | 11.99% | 4512.2  | 9.26%  |
| Tbox:Smad(T-box,MAD)/ESCd5-Smad2_3-ChIP-Seq(GSE29422)/Homer | AGGTGHCAGACA         | 1.00E-02 | -5.48E+00 | 0.0156 | 87  | 9.40%  | 3428.6  | 7.04%  |
| CHR(?)/Hela-CellCycle-Expression/Homer                      | SRGTTTCAAA           | 1.00E-02 | -5.44E+00 | 0.016  | 191 | 20.63% | 8402.6  | 17.25% |
| STAT6(Stat)/Macrophage-Stat6-ChIP-Seq(GSE38377)/Homer       | TTCKNAGAA            | 1.00E-02 | -5.37E+00 | 0.0169 | 192 | 20.73% | 8464.9  | 17.38% |
| CEBP:AP1(bZIP)/ThioMac-CEBPb-ChIP-Seq(GSE21512)/Homer       | DRTGTTGCAA           | 1.00E-02 | -5.30E+00 | 0.018  | 225 | 24.30% | 10109.9 | 20.75% |
| ZNF264(Zf)/HEK293-ZNF264.GFP-ChIP-Seq(GSE58341)/Homer       | RGGGCACTAAC          | 1.00E-02 | -5.25E+00 | 0.0187 | 210 | 22.68% | 9376    | 19.25% |
| Foxa2(Forkhead)/Liver-Foxa2-ChIP-Seq(GSE25694)/Homer        | CYTGTTTACWYW         | 1.00E-02 | -5.19E+00 | 0.0197 | 266 | 28.73% | 12184.7 | 25.01% |
| E2F1(E2F)/Hela-E2F1-ChIP-Seq(GSE22478)/Homer                | CWGGCGGGAA           | 1.00E-02 | -5.17E+00 | 0.0198 | 39  | 4.21%  | 1324.4  | 2.72%  |
| NFAT(RHD)/Jurkat-NFATC1-ChIP-Seq(Jolma et al.)/Homer        | ATTTTCCATT           | 1.00E-02 | -5.16E+00 | 0.02   | 269 | 29.05% | 12343.9 | 25.34% |
| Gata4(Zf)/Heart-Gata4-ChIP-Seq(GSE35151)/Homer              | NBWGATAAGR           | 1.00E-02 | -5.13E+00 | 0.0204 | 305 | 32.94% | 14170.4 | 29.09% |
| p53(p53)/Saos-p53-ChIP-Seq(GSE15780)/Homer                  | RRCATGYCYRGR         | 1.00E-02 | -5.03E+00 | 0.0221 | 44  | 4.75%  | 1552    | 3.19%  |
| p53(p53)/Saos-p53-ChIP-Seq/Homer                            | RRCATGYCYRGR         | 1.00E-02 | -5.03E+00 | 0.0221 | 44  | 4.75%  | 1552    | 3.19%  |
| CEBP:CEBP(bZIP)/MEF-Chop-ChIP-Seq(GSE35681)/Homer           | NTNATGCAAYMNNHTGMAAY | 1.00E-02 | -5.01E+00 | 0.0224 | 49  | 5.29%  | 1771.7  | 3.64%  |
| FOXP1(Forkhead)/HEK293-FOXP1-ChIP-Seq(GSE51673)/Homer       | NVWTGTTTAC           | 1.00E-02 | -4.88E+00 | 0.0251 | 315 | 34.02% | 14742   | 30.26% |
| Stat3(Stat)/mES-Stat3-ChIP-Seq(GSE11431)/Homer              | CTTCCGGGAA           | 1.00E-02 | -4.79E+00 | 0.0273 | 169 | 18.25% | 7456.8  | 15.31% |

**Table S3. Motif enrichment of known motifs by HOMER in *Nr1d1*<sup>-/-</sup> NKp46<sup>-</sup> ILC3s.**

| Rank | Motif        | Best match                                                       | P-value  | Log P-value | # of Target Sequences with Motif(of 1138) | % of Target Sequences with Motif | # of Background Sequences with Motif(of 48512) | % of Background Sequences with Motif |
|------|--------------|------------------------------------------------------------------|----------|-------------|-------------------------------------------|----------------------------------|------------------------------------------------|--------------------------------------|
| 1    | RACAGGAAGY   | Ets1-distal(ETS)/CD4+-PoIII-ChIP-Seq(Barski et al.)/Homer(0.967) | 1.00E-69 | -160.02     | 334                                       | 36.07%                           | 6378                                           | 13.09%                               |
| 2    | TGTGGTTT     | RUNX1(Runt)/Jurkat-RUNX1-ChIP-Seq(GSE29180)/Homer(0.981)         | 1.00E-48 | -111.56     | 292                                       | 31.53%                           | 6284.1                                         | 12.90%                               |
| 3    | VTGASTCAKN   | Atf3(bZIP)/GBM-ATF3-ChIP-Seq(GSE33912)/Homer(0.985)              | 1.00E-39 | -91.68      | 251                                       | 27.11%                           | 5457.5                                         | 11.20%                               |
| 4    | TGGCACNVWGCC | Tlx?(NR)/NPC-H3K4me1-ChIP-Seq(GSE16256)/Homer(0.907)             | 1.00E-38 | -88.04      | 225                                       | 24.30%                           | 4665                                           | 9.58%                                |
| 5    | GTTATGTAAC   | NFIL3/MA0025.1/Jaspar(0.920)                                     | 1.00E-34 | -79.06      | 75                                        | 8.10%                            | 636.2                                          | 1.31%                                |
| 6    | AACTAGGTCA   | RORgt(NR)/EL4-RORgt.Flag-ChIP-Seq(GSE56019)/Homer(0.970)         | 1.00E-33 | -76.48      | 136                                       | 14.69%                           | 2154                                           | 4.42%                                |
| 7    | CTGGCAGCCA   | NF1-halfsite(CTF)/LNCaP-NF1-ChIP-Seq(Unpublished)/Homer(0.722)   | 1.00E-15 | -35.35      | 296                                       | 31.97%                           | 10046.2                                        | 20.62%                               |
| 8    | DTGACCTCATTT | JUND(var.2)/MA0492.1/Jaspar(0.767)                               | 1.00E-13 | -31.55      | 21                                        | 2.27%                            | 113.3                                          | 0.23%                                |
| 9    | CACGTGAC     | Arntl/MA0603.1/Jaspar(0.982)                                     | 1.00E-13 | -30.55      | 219                                       | 23.65%                           | 7012.8                                         | 14.40%                               |

**Table S4. De novo motif enrichment by HOMER in *Nr1d1*<sup>-/-</sup> NKp46<sup>-</sup> ILC3s.**

| <b>Primer</b>          | <b>Forward</b>            | <b>Reverse</b>            |
|------------------------|---------------------------|---------------------------|
| <i>Nr1d1</i>           | TGGCATGGTGCTACTGTGTAAGG   | ATATTCTGTTGGATGCTCCGGCG   |
| <i>Nr1d1</i>           | GTCTCTCCGTTGGCATGTCT      | CCAAGTTCATGGCGCTCT        |
| <i>Nr1d2</i>           | GGAGTTCATGCTTGTGAAGGCTGT  | CAGACACTTCTTAAAGCGGCACTG  |
| <i>Clock</i>           | CACTCTCACAGCCCCACTGTAC    | CCCCACAAGCTACAGGAGCAGT    |
| <i>Per1</i>            | TGAAGCAAGACCGGGAGAG       | CACACACGCCATCACATCAA      |
| <i>Dbp</i>             | AATGACCTTTGAACCTGATCCCGCT | GCTCCAGTACTTCTCATCCTTCTGT |
| <i>Nfil3</i>           | CTTTCAGGACTACCAGACATCCAA  | GATGCAACTTCCGGCTACCA      |
| <i>Bmal1</i>           | TGACCCTCATGGAAGGTTAGAA    | GGACATTGCATTGCATGTTGG     |
| <i>Rorc</i>            | TTCACCCACCTCCACTG         | GTGCAGGAGTAGGCCACATT      |
| Eubacteria<br>16s rDNA | CGGCAACGAGCGCAACCC        | CCATTGTAGCACGTGTGTAGCC    |
| <i>Actb</i>            | GACGGCCAGGTCATCACTATTG    | AGGAAGGCTGGAAAAGAGCC      |
| <i>Il17a</i>           | CCAAGGACTTCTCCAGAATG      | CCCAGATCACAGAGGGATATCTA   |
| <i>Il22</i>            | TCCTGACCAAACCTCAGCAATC    | CTTGATCTCTCCACTCTCTCCA    |

**Table S5. Sequences of primers used for qPCR**
